# Supplementary material
Source: Research Square preprint supplement (doi:10.21203/rs.3.rs-8931680/v1)
Supplement: Supplementary file 1 [file b699add5a8382f06a4464ec4.docx]

The authors declare that there are no conflicts of interest regarding the publication of this paper. All funding sources have been acknowledged, and there are no financial or personal relationships that could influence the research outcomes or interpretations presented in this study.
