# Supplementary material
Source: Research Square preprint supplement (doi:10.21203/rs.3.rs-8931680/v1)
Supplement: Supplementary file 2 [file f918079ffc9e28329bcae003.docx]

To the Editorial Board of *The Journal of Real Estate Finance and Economics,*

I am writing this disclosure statement following the guidelines of *The Journal of Real Estate Finance and Economics* to disclose any potential conflicts of interest that may arise from submitting the manuscript titled "*The Economics of Heritage: How Historic Buildings Shape Housing Market and Urban Development*" for consideration of publication.

1. Conflict of Interest: I have no financial interests or affiliations that could be perceived as having a potential bias or influence over the contents of this manuscript.
2. Funding Sources: This research was conducted under the National Natural Science Foundation of China (Grant No.72573138) and Natural Science Foundation of Fujian Province (Grant No. 2025J01038).
3. Previous Presentations: The content of this manuscript has not been submitted simultaneously for consideration in any other academic or scientific journal.
4. Acknowledgments: The author thanks participants at seminars and conferences at Urban and Regional Economics for their valuable comments. All errors are our own.
5. Data Availability: Any data presented in this manuscript necessary to support the study's conclusions will be made available upon request.

I affirm that the information provided in this disclosure statement is accurate and complete. Thank you for considering our manuscript for publication.

Sincerely,

*Xiaofang Dong*

*Wang Yanan Institute for Studies in Economics*

*Xiamen Univeristy*
